# Supplementary material
Source: PubMed Central journal article supplement (PMC3522266)

**Supplemental Information****Lamin B receptor recognizes specific modifications of histone H4 in heterochromatin formation**

Yasuhiro Hirano, Kohji Hizume, Hiroshi Kimura, Kunio Takeyasu,  
Tokuko Haraguchi and Yasushi Hiraoka

**SUPPLEMENTAL EXPERIMENTAL PROCEDURE**

*Calculation of the molar ratio of LBR to histone* - To determine the amount of LBR within a nucleus, quantitative Western blotting was carried out according to Holaska *et al.* (1) with some modifications. HeLa cells were lysed with Laemmli's SDS sample buffer, and aliquots of the cell lysate, equivalent to  $2.5 \times 10^4$  and  $5.0 \times 10^4$  cells, were subjected to SDS-PAGE along with 2, 5, 10 and 20 ng [70.1, 175, 350 and 701 fmol ( $10^{-15}$  mol), respectively] of recombinant purified His-tagged NP<sup>WT</sup>. After transfer to PVDF membrane, LBR protein was probed with anti-LBR antibody and quantified by comparing the staining with that of the control recombinant protein. According to Fig. S6, we determined there was 399 fmol of LBR in  $5.0 \times 10^4$  HeLa cells. Based on this evaluation, we further estimated the concentration of LBR beneath the nuclear envelope as follows. We estimated the size of the nucleus as a sphere 20  $\mu\text{m}$  in diameter, and defined its interaction zone (IZ) (1) within a region of 20 nm from the inner nuclear membrane (INM) as a globular protein of 24 kDa (equal to the molecular weight of the nucleoplasmic region of LBR), which was estimated to be nearly 20 nm in size. The volume of LBR's IZ ( $V_{IZ}$ ) was estimated to be 25.1 fl ( $10^{-15}$  liters).

The amount of core histone was estimated as follows. It has been reported that chromatin of eukaryotes contains nearly equal weights of histone and DNA (2). In the case of human cells, one cell possesses approximately 6.0 pg of DNA. This amount is equal to 56 amol ( $10^{-18}$  mol) of histone octamer (molecular weight: 108 kDa). If histone is distributed uniformly in the 20  $\mu\text{m}$ -diameter nucleus, the concentration would be approximately 13  $\mu\text{M}$ . The ratio of the fluorescence intensity of DNA stained with DAPI around the NE to that of an intra-region of the nucleus was 5.8:1 (data not shown). Then, the concentration of core histone in the IZ was estimated at about 75  $\mu\text{M}$ .

The concentration of LBR and that of core histone in the IZ were estimated to be 318 and 75.4  $\mu\text{M}$ , respectively, as shown above (also see Holaska *et al.* (1)). Therefore, the molar ratio of LBR to histone in the IZ region is estimated to be 4:1.

**SUPPLEMENTAL FIGURE LEGENDS**

**Fig. S1. Cellspot histone peptide array data.** (A) Cellspot was incubated with NP<sup>WT</sup> for 1.5 h, washed, and then probed with anti-GST antibody. Blue, red and yellow regions indicate spots containing histone H3, H4 and H2A/B-related peptides, respectively. (B) Modified histone peptides on

each spot, located on the listed spot numbers, in (A) are shown. Details of the complete matrix of peptides are provided as supplemental table S1 on the *J. Biol. Chem.* website. Black staining of the spots indicates binding to NP<sup>WT</sup>. In Figure 1d, green regions are indicated.

**Fig. S2. Loss of histone modification-specific binding activity in NK<sup>W16A</sup>.** Celluspot was incubated with NP<sup>W16A</sup> for 1.5 h, washed, and then probed with anti-GST antibody. Blue, red and yellow regions indicate spots containing histone H3, H4 and H2A/B-related peptides, respectively. An overexposed image is shown in the lower panel.

**Fig. S3. Molar ratio of LBR to histones.** (A) Quantification of LBR in HeLa cells. The cell lysates, equivalent to  $2.5 \times 10^4$  and  $5.0 \times 10^4$  cells, and a recombinant His-tagged NP<sup>WT</sup> protein (70.1, 175, 350,  $701 \times 10^{-15}$  mol) were separated by SDS-PAGE, transferred to PVDF, and probed with anti-LBR antibody. The amount of LBR in  $5.0 \times 10^4$  HeLa cells was estimated as 399 fmol. (B) The diagram shows how the volume of a 20 nm IZ region near the INM of a 20  $\mu$ m-diameter nucleus was calculated; the concentration of LBR and of core histones in the IZ were estimated as 318 and 75.4  $\mu$ M, respectively (see Methods and also Holaska *et al.* (1)). Therefore, the molar ratio of LBR to histone in the IZ region is estimated to be 4:1.

**Fig. S4. AFM images of the aggregated chromatin induced by NP<sup>WT</sup>.** Chromatin was reconstituted using 1.8 kbp linear dsDNA. After incubation with GST (A), NP<sup>WT</sup> (B), NP<sup>W16A</sup> (C) and Tud<sup>WT</sup> (D), the chromatin structure was observed by AFM. Two  $\mu$ m square regions are shown. Arrows indicate highly aggregated chromatin formed by NP<sup>WT</sup>. Bars, 500 nm.

**Fig. S5. NP<sup>WT</sup> induced aggregation with 26 kbp chromatin as well as with 1.8 kbp chromatin.** Chromatin was reconstituted using 26 kbp plasmid dsDNA. After incubation with GST (A), NP<sup>WT</sup> (B), NP<sup>W16A</sup> (C) and Tud<sup>WT</sup> (D), the chromatin structure was observed by AFM. Bars, 500 nm.

#### SUPPLEMENTAL REFERENCES

1. Holaska, J. M., Lee, K. K., Kowalski, A. K., and Wilson, K. L. (2003) *J. Biol. Chem.* **278**(9), 6969-6975
2. Kornberg, R. D. (1974) *Science* **184**(139), 868-871

Figure S1

A

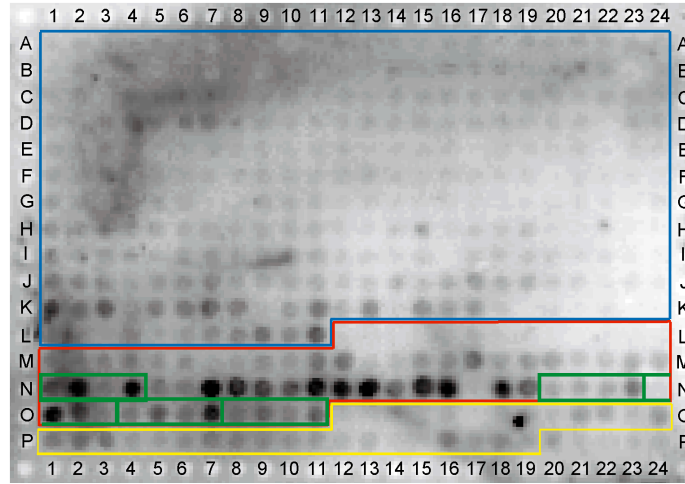

   : H3-related peptides       : H4-related peptides  
   : H2A/B-related peptides

B

|                          | spot number                | sequence                     | portion  | modification |        |       |            | N-terminus |
|--------------------------|----------------------------|------------------------------|----------|--------------|--------|-------|------------|------------|
|                          |                            |                              |          | 1st          | 2nd    | 3rd   | 4th        |            |
| K20-related peptides     | N1                         | GKGGAKRHRKme1VLRDNIQGIT      | H4 11-30 | K20me1       |        |       |            | acetylated |
|                          | N2                         | GKGGAKRHRKme2VLRDNIQGIT      | H4 11-30 | K20me2       |        |       |            | acetylated |
|                          | N3                         | GKGGAKRHRKme3VLRDNIQGIT      | H4 11-30 | K20me3       |        |       |            | acetylated |
|                          | N4                         | GKGGAKRHRKacVLRDNIQGIT       | H4 11-30 | K20ac        |        |       |            | acetylated |
|                          | N20                        | GKGGAKRHRme2aKme1VLRDNIQGIT  | H4 11-30 | R19me2a      | K20me1 |       |            | acetylated |
|                          | N21                        | GKGGAKRHRme2aKme2VLRDNIQGIT  | H4 11-30 | R19me2a      | K20me2 |       |            | acetylated |
|                          | N22                        | GKGGAKRHRme2aKme3VLRDNIQGIT  | H4 11-30 | R19me2a      | K20me3 |       |            | acetylated |
|                          | N23                        | GKGGAKRHRme2aKacVLRDNIQGIT   | H4 11-30 | R19me2a      | K20ac  |       |            | acetylated |
|                          | N24                        | GKGGAKRHRme2sKme1VLRDNIQGIT  | H4 11-30 | R19me2s      | K20me1 |       |            | acetylated |
|                          | O1                         | GKGGAKRHRme2sKme2VLRDNIQGIT  | H4 11-30 | R19me2s      | K20me2 |       |            | acetylated |
|                          | O2                         | GKGGAKRHRme2sKme3VLRDNIQGIT  | H4 11-30 | R19me2s      | K20me3 |       |            | acetylated |
| K12&K16-related peptides | L12                        | SGRGKGGKGLGKGGAKRHR          | H4 1-19  | Unmod        |        |       |            | free       |
|                          | L18                        | SGRGKGGKGLGKGGAKRHR          | H4 1-19  | K12ac        |        |       |            | free       |
|                          | L19                        | SGRGKGGKGLGKGGAKRHR          | H4 1-19  | K16ac        |        |       |            | free       |
|                          | M4                         | SGRGKGGKacGLGKacGGAKRHR      | H4 1-19  | K8ac         | K12ac  |       |            | free       |
|                          | M5                         | SGRGKGGKacGLGKGGAKacRHR      | H4 1-19  | K8ac         | K16ac  |       |            | free       |
|                          | M6                         | SGRGKGGKacGLGKacGGAacRHR     | H4 1-19  | K12ac        | K16ac  |       |            | free       |
|                          | M11                        | SGRGKacGGKacGLGKacGGAKRHR    | H4 1-19  | K5ac         | K8ac   | K12ac |            | free       |
|                          | M12                        | SGRGKGGKacGLGKacGGAacRHR     | H4 1-19  | K8ac         | K12ac  | K16ac |            | free       |
|                          | M15                        | SRme2sGKacGGKacGLGKacGGAKRHR | H4 1-19  | R3me2s       | K5ac   | K8ac  | K12ac      | free       |
|                          | M16                        | SRme2sGKacGGKacGLGKacGGAKRHR | H4 1-19  | R3me2s       | K5ac   | K8ac  | K12ac      | free       |
|                          | M17                        | SGRGKacGGKacGLGKacGGAacRHR   | H4 1-19  | K5ac         | K8ac   | K12ac | K16ac      | free       |
| M18                      | GKGGAKRHRKVLVDNIQGIT       | H4 11-30                     | Unmod    |              |        |       | acetylated |            |
| M19                      | GKacGGAKRHRKVLVDNIQGIT     | H4 11-30                     | K12ac    |              |        |       | acetylated |            |
| M20                      | GKGGAKacRHRKVLVDNIQGIT     | H4 11-30                     | K16ac    |              |        |       | acetylated |            |
| N7                       | GKacGGAacRHRKVLVDNIQGIT    | H4 11-30                     | K12ac    | K16ac        |        |       | acetylated |            |
| N8                       | GKGGAKacRme2sHRKVLVDNIQGIT | H4 11-30                     | K16ac    | R17me2s      |        |       | acetylated |            |
| N9                       | GKGGAKacRme2aHRKVLVDNIQGIT | H4 11-30                     | K16ac    | R17me2a      |        |       | acetylated |            |
| N10                      | GKGGAKacRHRme2sKVLVDNIQGIT | H4 11-30                     | K16ac    | R19me2s      |        |       | acetylated |            |
| N11                      | GKGGAKacRHRme2aKVLVDNIQGIT | H4 11-30                     | K16ac    | R19me2a      |        |       | acetylated |            |
| N12                      | GKGGAKacRHRKme1VLRDNIQGIT  | H4 11-30                     | K16ac    | K20me1       |        |       | acetylated |            |
| N13                      | GKGGAKacRHRKme2VLRDNIQGIT  | H4 11-30                     | K16ac    | K20me2       |        |       | acetylated |            |
| N14                      | GKGGAKacRHRKme3VLRDNIQGIT  | H4 11-30                     | K16ac    | K20me3       |        |       | acetylated |            |
| N15                      | GKGGAKacRHRKacVLRDNIQGIT   | H4 11-30                     | K16ac    | K20ac        |        |       | acetylated |            |
| N16                      | GKacGGAacRHRKme1VLRDNIQGIT | H4 11-30                     | K12ac    | K16ac        | K20me1 |       | acetylated |            |
| N17                      | GKacGGAacRHRKme2VLRDNIQGIT | H4 11-30                     | K12ac    | K16ac        | K20me2 |       | acetylated |            |
| N18                      | GKacGGAacRHRKme3VLRDNIQGIT | H4 11-30                     | K12ac    | K16ac        | K20me3 |       | acetylated |            |
| N19                      | GKacGGAacRHRKacVLRDNIQGIT  | H4 11-30                     | K12ac    | K16ac        | K20ac  |       | acetylated |            |

Figure S2

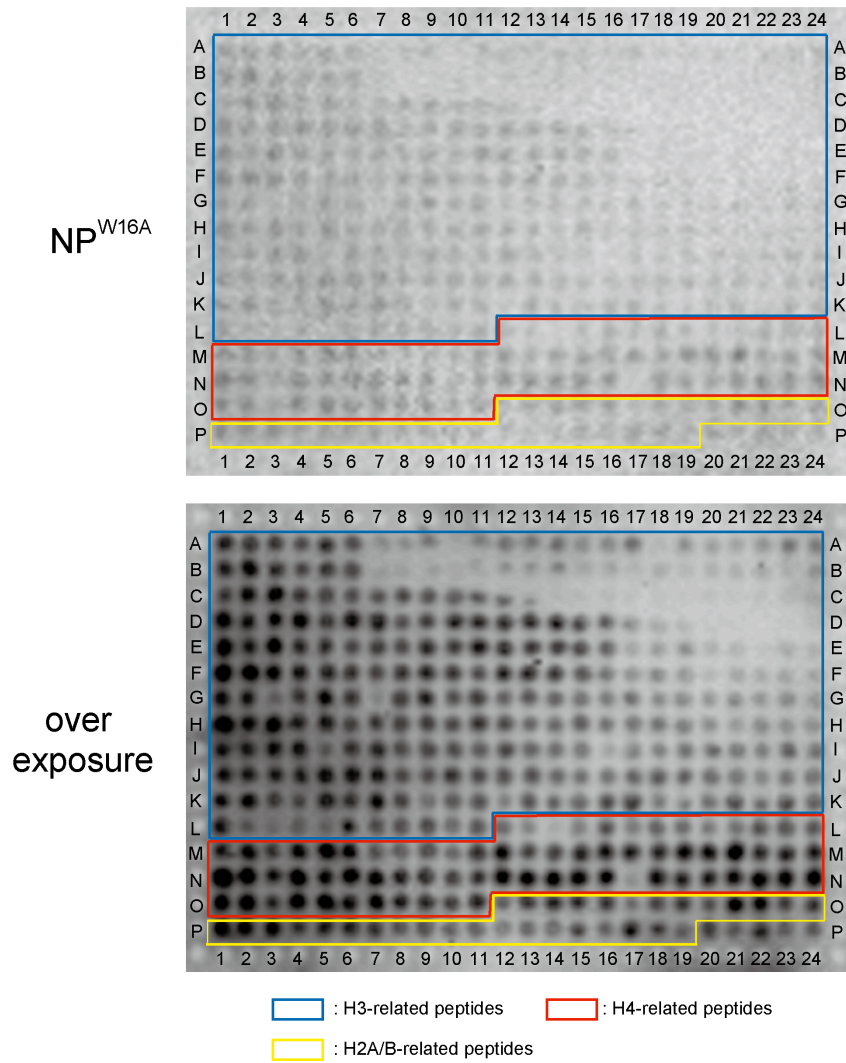

Figure S3

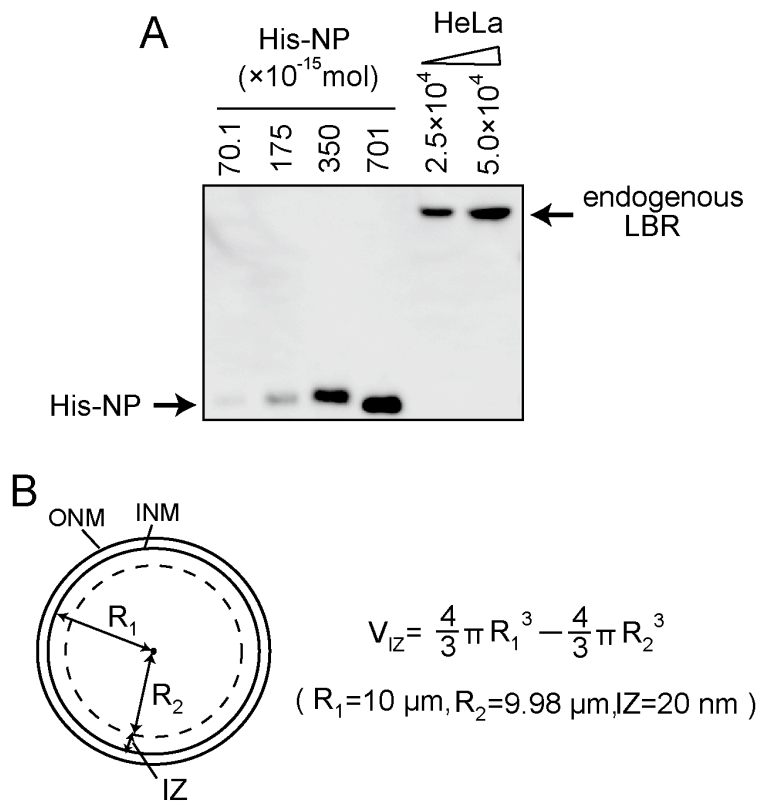

Figure S4

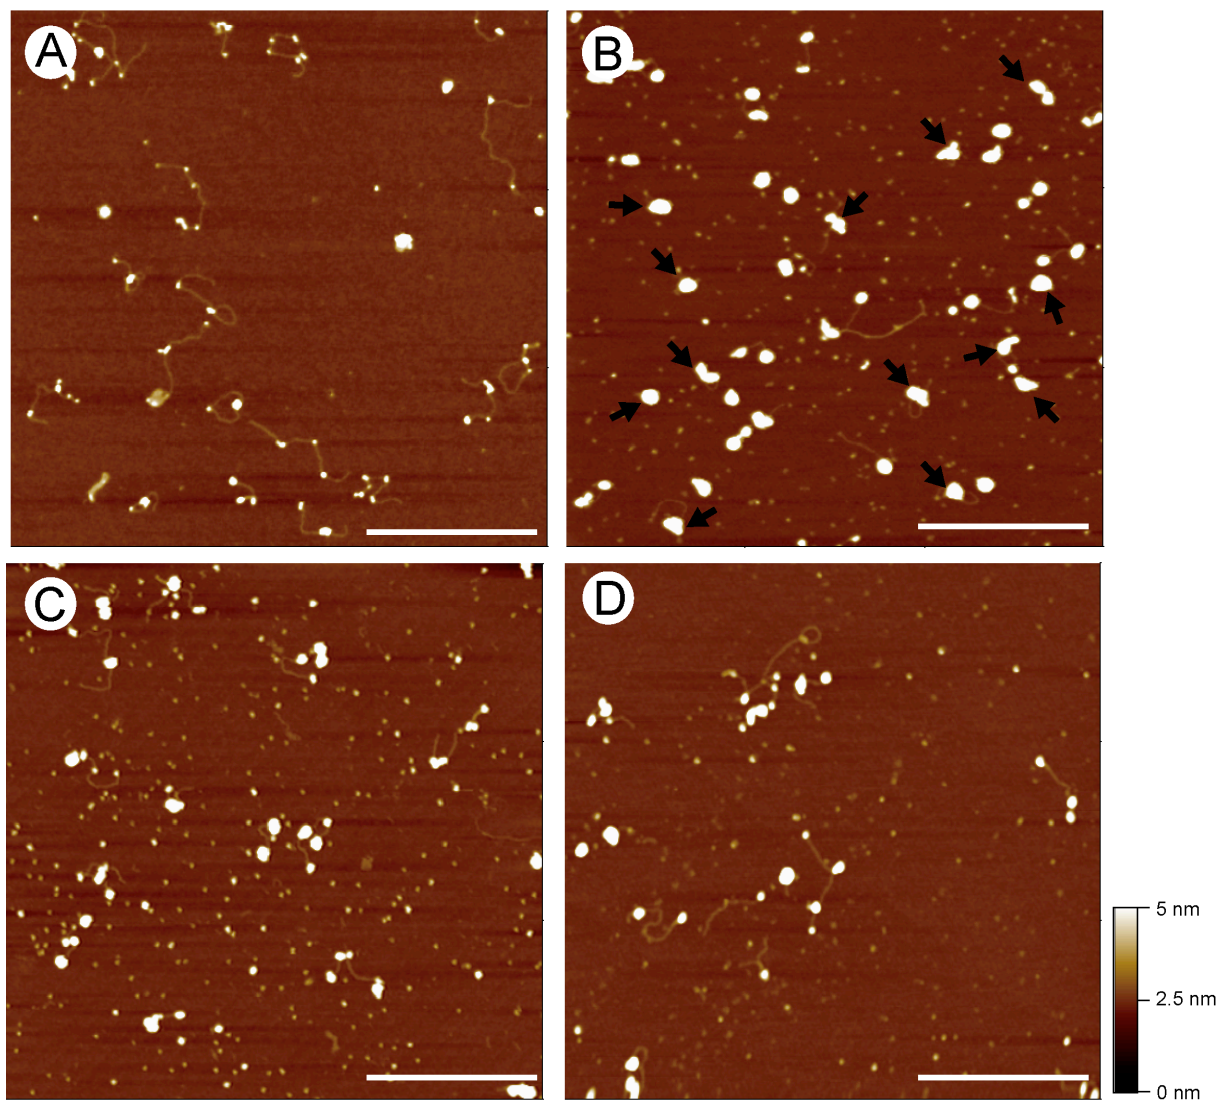

Figure S5

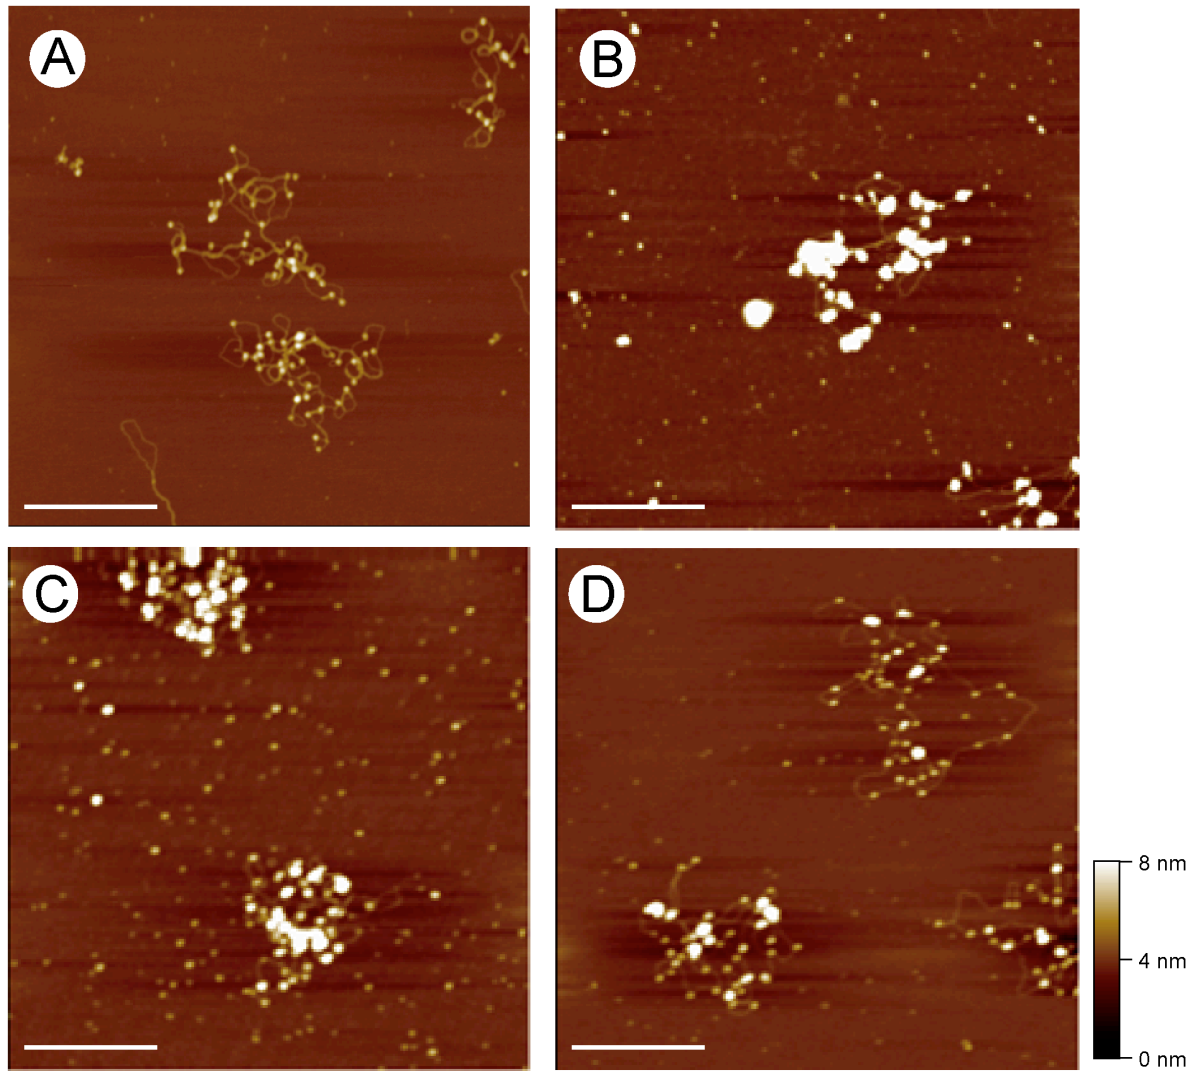

Supplement: supp_M112.397950_jbc.M112.397950-1.pdf [file supp_M112.397950_jbc.M112.397950-1.pdf]
